# Supplementary material for: DDX3X promotes the biogenesis of a subset of miRNAs and the potential roles they played in cancer development
Source: PubMed Central journal article supplement (PMC5009351; doi:10.1038/srep32739), 2016-09-02
Supplement: srep32739-s1.pdf [file srep32739-s1.pdf]

Supplementary information

## **DDX3X promotes the biogenesis of a subset of miRNAs and the potential roles they played in cancer development**

Luqing Zhao<sup>1,2,3\*</sup>, Yitao Mao<sup>4</sup>, Yuelong Zhao<sup>5</sup>, Yanong He<sup>5</sup>

<sup>1</sup> Department of Pathology, Xiangya Hospital, Central South University, Changsha, Hunan 410008, China;  
and Department of Pathology, School of Basic Medical Science, Xiangya School of Medicine, Central  
South University, Changsha, Hunan 410013, China.

<sup>2</sup> Department of Dermatology, Xiangya Hospital, Central South University, Changsha, Hunan 410008,  
China.

<sup>3</sup> Hunan Key Laboratory of Skin Cancer and Psoriasis, Xiangya Hospital, Central South University,  
Changsha, Hunan 410008, China.

<sup>4</sup> Department of Radiology, Xiangya Hospital, Central South University, Changsha, Hunan 410008,  
China.

<sup>5</sup> School of Computer Science and Engineering, South China University of Technology, Guangzhou,  
Guangdong 510640, China.

\*Correspondence to:

Dr. Luqing Zhao, E-mail: [Lqz2010@hotmail.com](mailto:Lqz2010@hotmail.com)

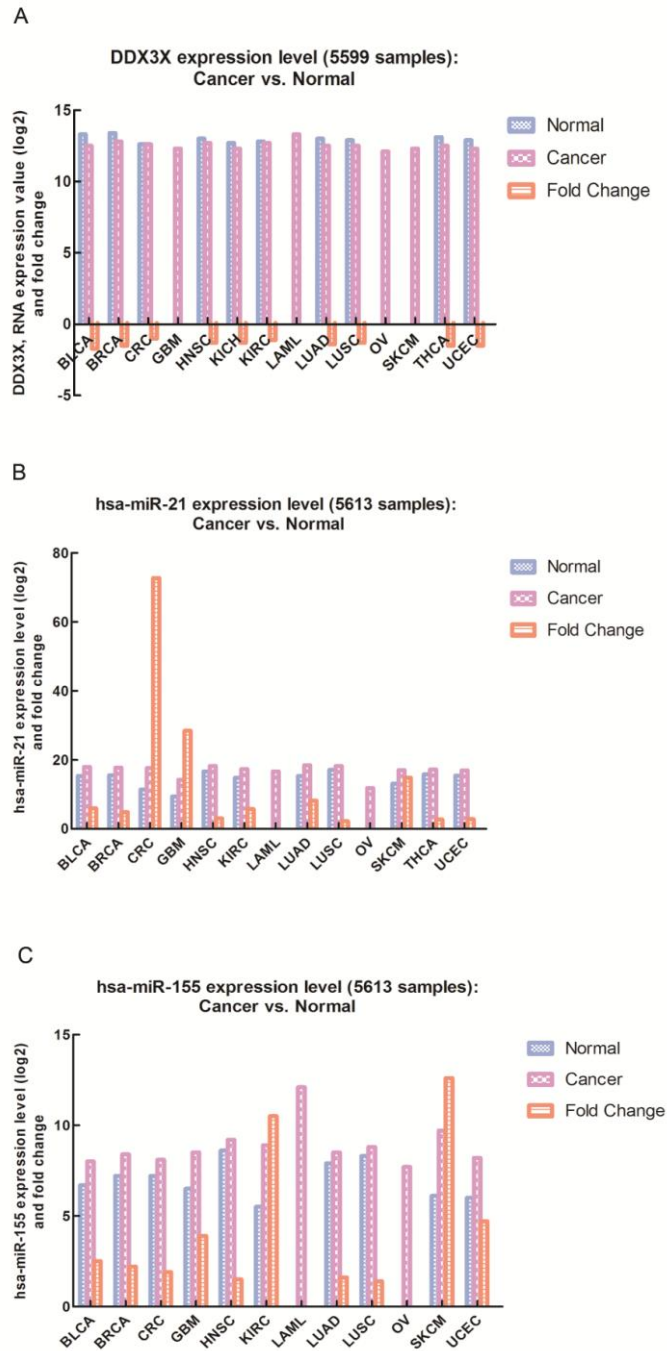

**Figure S1. The relative expression levels of DDX3X and its irrelevant miRNAs in different kinds of cancers.** The expression levels and fold changes of DDX3X (A), miR-21 (B), miR-155 (C) in different kinds of cancers versus their adjacent normal tissues analyzed by The Cancer Genome Atlas (TCGA) database and starBase database in clinical samples.

Abbreviations: BLCA: urothelial bladder cancer, BRCA: breast cancer, CRC: colon and rectal adenocarcinoma, GBM: glioblastoma multiforme, HNSC: head and neck squamous cell carcinoma, KICH: chromophobe renal cell carcinoma, KIRC: clear cell kidney carcinoma, LAML: acute myeloid leukemia, LUAD: lung adenocarcinoma, LUSC: lung squamous cell carcinoma, OV: ovarian serous cystadenocarcinoma, SKCM: cutaneous melanoma, THCA: papillary thyroid carcinoma, UCEC: uterine corpus endometrial carcinoma.

A

SKCM

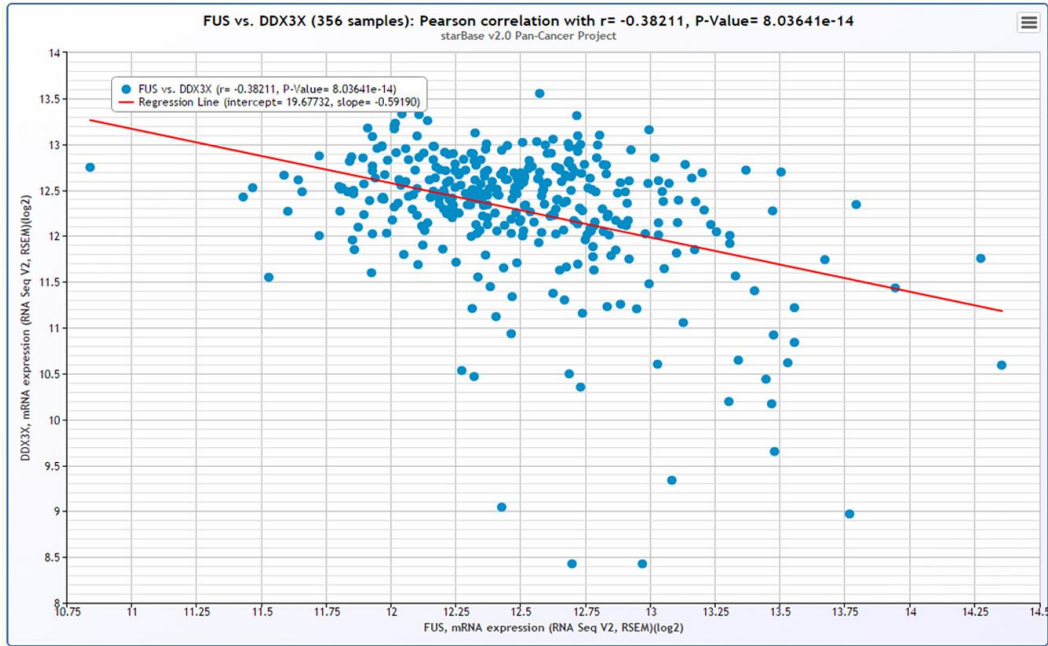

B

GBM

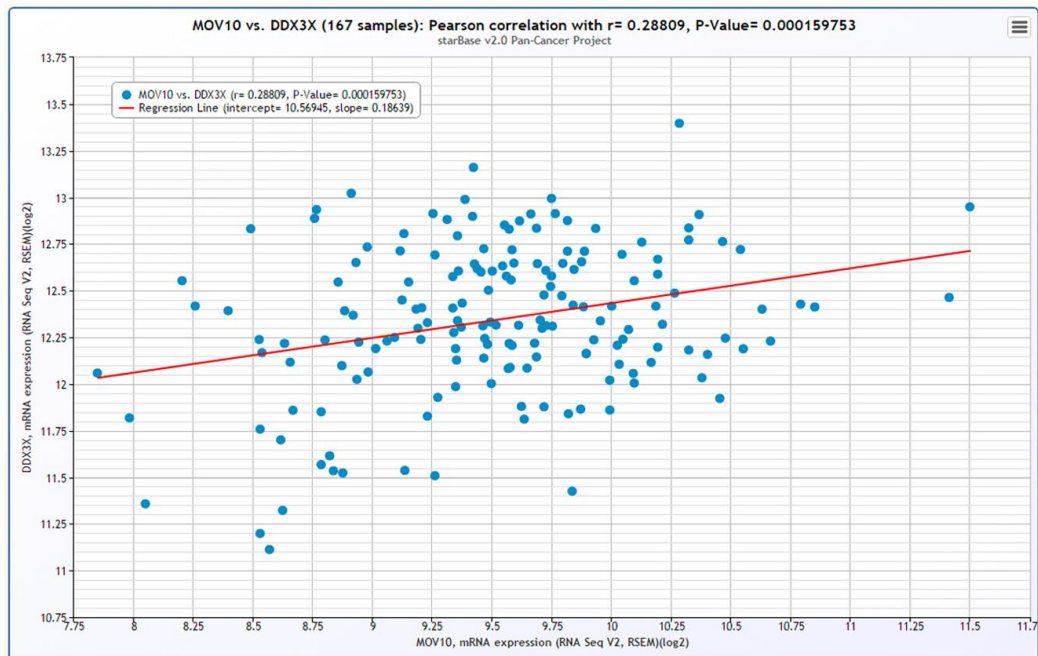

**Figure S2. The representative figures for the correlations of DDX3X and its co-factors in cancers. (A) The correlation of DDX3X and its co-factor FUS in 356**

SKCM (cutaneous melanoma) samples. (B) The correlation of DDX3X and its co-factor MOV10 in 167 GBM (glioblastoma multiforme) samples. The figures were downloaded from the starBase database and all the data were analyzed by The Cancer Genome Atlas (TCGA) database.

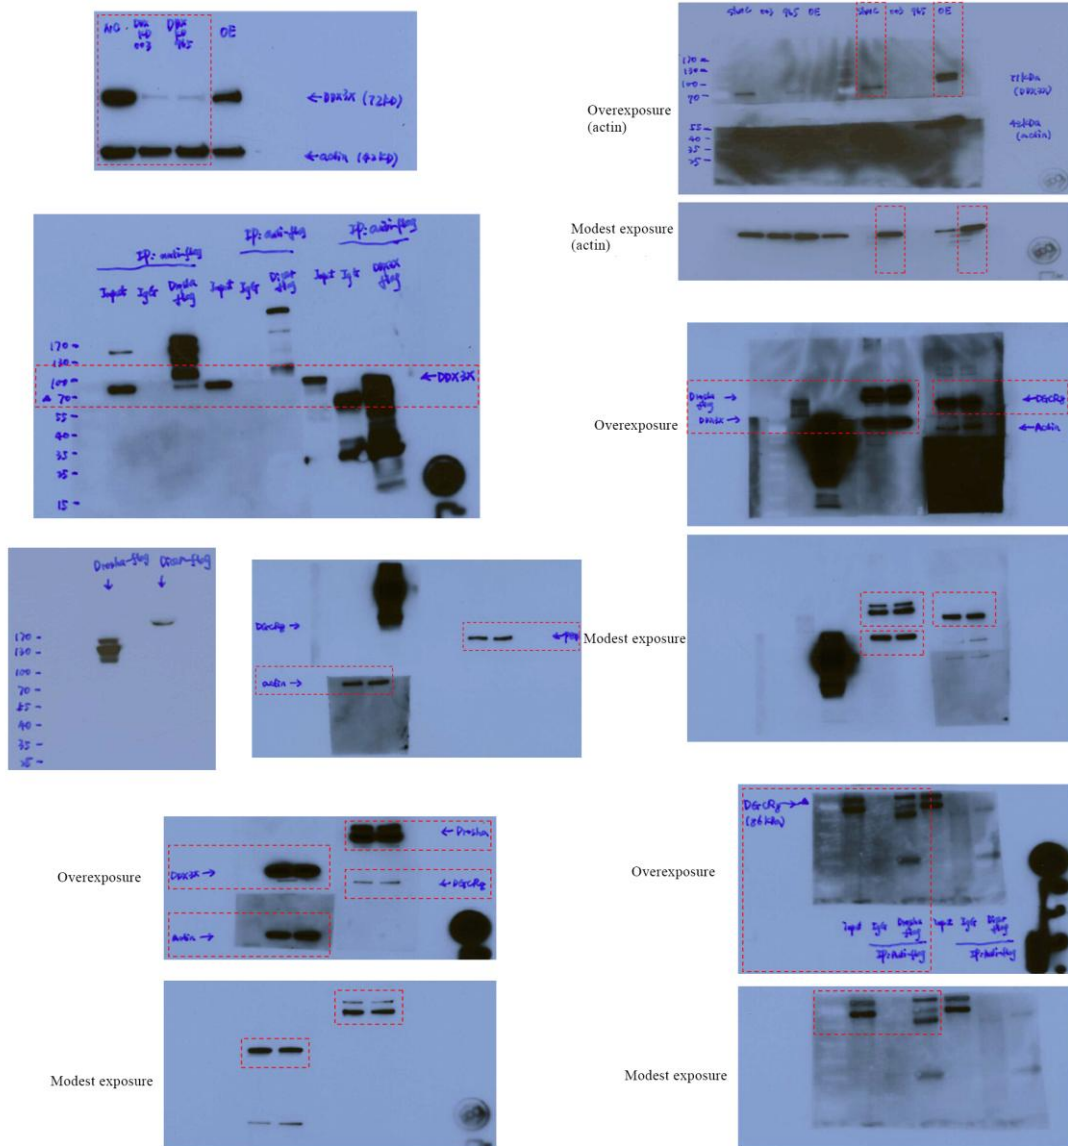

**Figure S3. The uncropped full-length blots images for WB and IP experiments.**

**Table S1. The co-factors which have interactions with DDX3X**

| <b>Name</b> | <b>Description</b>                                  |
|-------------|-----------------------------------------------------|
| HuR         | ELAV like RNA binding protein 1                     |
| PTB         | polypyrimidine tract binding protein 1              |
| IGF2BP1     | insulin like growth factor 2 mRNA binding protein 1 |
| IGF2BP2     | insulin like growth factor 2 mRNA binding protein 2 |
| IGF2BP3     | insulin like growth factor 2 mRNA binding protein 3 |
| eIF4AIII    | eukaryotic translation initiation factor 4A3        |
| DGCR8       | DGCR8 microprocessor complex subunit                |
| FMRP        | fragile X mental retardation protein                |
| FXR1        | FMR1 autosomal homolog 1                            |
| FXR2        | FMR1 autosomal homolog 2                            |
| FUS         | FUS RNA binding protein                             |
| LIN28A      | lin-28 homolog A                                    |
| LIN28B      | lin-28 homolog B                                    |
| MOV10       | Mov10 RISC complex RNA helicase                     |
| ALKBH5      | alkB homolog 5, RNA demethylase                     |
| C17ORF85    | nuclear cap binding subunit 3                       |
| C22ORF28    | RNA 2',3'-cyclic phosphate and 5'-OH ligase         |

|         |                                                                 |
|---------|-----------------------------------------------------------------|
| CAPRIN1 | cell cycle associated protein 1                                 |
| ZC3H7B  | zinc finger CCCH-type containing 7B                             |
| EWSR1   | EWS RNA binding protein 1                                       |
| SFRS1   | serine and arginine rich splicing factor 1                      |
| U2AF65  | U2 small nuclear RNA auxiliary factor 2                         |
| TIA1    | TIA1 cytotoxic granule-associated RNA<br>binding protein        |
| TIAL1   | TIA1 cytotoxic granule-associated RNA<br>binding protein-like 1 |
| hnRNP C | heterogeneous nuclear ribonucleoprotein C<br>(C1/C2)            |
| UPF1    | UPF1, RNA helicase and ATPase                                   |
